# Supplementary material for: Host-Specific Serum Factors Control the Development and Survival of Schistosoma mansoni
Source: PubMed Central journal article supplement (PMC8103320; doi:10.3389/fimmu.2021.635622), 2021-04-23
Supplement: Table_1.pdf [file Table_1.pdf]

| <b>Viability score points</b>   |                    | <b>0</b>                                      | <b>1</b>                  | <b>2</b>                                            | <b>3</b>                                  |
|---------------------------------|--------------------|-----------------------------------------------|---------------------------|-----------------------------------------------------|-------------------------------------------|
| <b>Description of parameter</b> | <b>motility</b>    | Regular, non-hectic, with change in direction | Regular, reduced activity | Irregular and hectic or only internal gut movements | No movement                               |
|                                 | <b>morphology</b>  | Sharp outline, no blebbing                    | Sharp outline             | Blebbing of the tegument                            | Blebbing, rough tegument, blurred contour |
|                                 | <b>granularity</b> | No granularity                                | Light granularity         | Moderate granularity                                | Heavy granularity                         |
